# Supplementary material for: Regional Variations in Pesticide Residue Detection Rates and Concentrations in Saudi Arabian Crops
Source: MDPI journal article supplement (doi:10.3390/toxics11090798), 2023-09-21
Supplement: s1 [file s1]

**Table S1.** Toxicity of Pesticide Residues Assessed according to WHO and EPA hazard classification

| Pesticide residue   | Toxicity      |                                  |
|---------------------|---------------|----------------------------------|
| 2-phenylphenol      | Class III     | Slightly hazardous               |
| Abamectin           | Class Ib      | Highly hazardous                 |
| Acetamiprid         | Class II      | Moderately hazardous             |
| Azoxystrobin        | Class U       | Unlikely to present acute hazard |
| Bifenazate          | Class U       | Unlikely to present acute hazard |
| Bifenthrin          | Class II      | Moderately hazardous             |
| Boscalid            | Class U       | Unlikely to present acute hazard |
| Bupirimate          | Class III     | Slightly hazardous               |
| Carbendazim         | Class U       | Unlikely to present acute hazard |
| Chlorantraniliprole | Class U       | Unlikely to present acute hazard |
| Chlorfenapyr        | Class II      | Moderately hazardous             |
| Chlorpyrifos        | Class II      | Moderately hazardous             |
| Clothianidin        | Class II      | Moderately hazardous             |
| Cypermethrin        | Class II      | Moderately hazardous             |
| Cyprodinil          | Class III EPA | Slightly hazardous               |
| Deltamethrin        | Class II      | Moderately hazardous             |
| Diazinon            | Class II      | Moderately hazardous             |
| Difenoconazole      | Class II      | Moderately hazardous             |
| Dinotefuran         | Class III     | Slightly hazardous               |
| Emamectin           | Class II      | Moderately hazardous             |
| Ethoprophos         | Class Ia      | Extremely hazardous              |
| Etofenprox          | Class U       | Unlikely to present acute hazard |
| Fenamiphos          | Class Ib      | Highly hazardous                 |
| Fenbuconazole       | Class III     | Slightly hazardous               |
| Fenhexamid          | Class U       | Unlikely to present acute hazard |
| fenpropimorph       | Class III     | Slightly hazardous               |
| Fenpyroximate       | Class II      | Moderately hazardous             |
| Fipronil            | Class II      | Moderately hazardous             |
| Fludioxonil         | Class U       | Unlikely to present acute hazard |
| Fluopyram           | Class III     | Slightly hazardous               |
| Flutriafol          | Class II      | Moderately hazardous             |
| Imazalil            | Class II      | Moderately hazardous             |
| Imidacloprid        | Class II      | Moderately hazardous             |
| Indoxacarb          | Class II      | Moderately hazardous             |
| Lambda-Cyhalothrin  | Class II      | Moderately hazardous             |
| Malathion           | Class III     | Slightly hazardous               |
| Metalaxyl           | Class II      | Moderately hazardous             |

|                      |              |                                  |
|----------------------|--------------|----------------------------------|
| Methomyl             | Class Ib     | Highly hazardous                 |
| Metribuzin           | Class II     | Moderately hazardous             |
| Myclobutanil         | Class II EPA | Moderately hazardous.            |
| Penconazole          | Class III    | Slightly hazardous               |
| Pendimethalin        | Class II     | Moderately hazardous             |
| Phosmet              | Class II     | Moderately hazardous             |
| Pirimicarb           | Class II     | Moderately hazardous             |
| Pirimicarb desmethyl | Class II     | Moderately hazardous             |
| Propamocarb          | Class U      | Unlikely to present acute hazard |
| Propargite           | Class III    | Slightly hazardous               |
| Propiconazole        | Class II     | Moderately hazardous             |
| Pyraclostrobin       | Class II     | Moderately hazardous             |
| Pyridaben            | Class II     | Moderately hazardous             |
| Pyrimethanil         | Class III    | Slightly hazardous               |
| Pyriproxyfen         | Class U      | Unlikely to present acute hazard |
| Spirodiclofen        | Class III    | Slightly hazardous               |
| Tebuconazole         | Class II     | Moderately hazardous             |
| Tetraconazole        | Class II     | Moderately hazardous             |
| Tetramethrin         | Class U      | Unlikely to present acute hazard |
| Thiabendazole        | Class III    | Slightly hazardous               |
| Thiamethoxam         | Class II     | Moderately hazardous             |
| Thiophanate-methyl   | Class U      | Unlikely to present acute hazard |
| Triadimenol          | Class II     | Moderately hazardous             |
| Trifloxystrobin      | Class U      | Unlikely to present acute hazard |

Note: Classification is based on oral and Dermal LD<sub>50</sub> for the rat (mg/kg body weight)

**Table S2.** Prevalence of Pesticide Residues according to region and food type

| Pesticide Residues  | All       | Western   | Central   | Northern  | Eastern   | <i>p</i> -Value | Fruits   | Vegetables | <i>p</i> -Value |
|---------------------|-----------|-----------|-----------|-----------|-----------|-----------------|----------|------------|-----------------|
|                     | 392       | 41        | 146       | 131       | 74        |                 | 149      | 243        |                 |
| <b>Absent</b>       | 54 (13.8) | 12 (29.3) | 15 (10.3) | 15 (11.5) | 12 (16.2) | 0.01            | 13 (8.7) | 41 (16.9)  | 0.02            |
| 2-phenylphenol      | 5 (1.3)   | 0 (0.0)   | 2 (1.4)   | 1 (0.8)   | 2 (2.7)   | 0.57            | 3 (2.0)  | 2 (0.8)    | 0.31            |
| Abamectin           | 6 (1.5)   | 0         | 2 (1.4)   | 4 (3.1)   | 0 (0.0)   | 0.28            | 1 (0.7)  | 5 (2.1)    | 0.28            |
| Acetamiprid         | 17 (4.3)  | 0         | 6 (4.1)   | 6 (4.6)   | 5 (6.8)   | 0.4             | 7 (4.7)  | 10 (4.1)   | 0.78            |
| Azoxystrobin        | 10 (2.6)  | 0         | 2 (1.4)   | 6 (4.6)   | 2 (2.7)   | 0.25            | 3 (2.0)  | 7 (2.9)    | 0.6             |
| Bifenazate          | 6 (1.5)   | 1 (2.4)   | 4 (2.7)   | 1 (0.8)   | 0         | 0.35            | 3 (2.0)  | 3 (1.2)    | 0.54            |
| Bifenthrin          | 2 (0.5)   | 0         | 0 (0.0)   | 1 (0.8)   | 1 (1.4)   | 0.54            | 1 (0.7)  | 1 (0.4)    | 0.73            |
| Boscalid            | 9 (2.3)   | 1 (2.4)   | 3 (2.1)   | 3 (2.3)   | 2 (2.7)   | 0.99            | 5 (3.4)  | 4 (1.6)    | 0.27            |
| Bupirimate          | 4 (1.0)   | 1 (2.4)   | 1 (0.7)   | 1 (0.8)   | 1 (1.4)   | 0.77            | 4 (2.7)  | 0          | 0.01            |
| Carbendazim         | 2 (0.5)   | 0         | 2 (1.4)   | 0         | 0         | 0.34            | 1 (0.7)  | 1 (0.4)    | 0.73            |
| Chlorantraniliprole | 3 (0.8)   | 0         | 1 (0.7)   | 2 (1.5)   | 0         | 0.59            | 1 (0.7)  | 2 (0.8)    | 0.87            |
| Chlorfenapyr        | 1 (0.3)   | 0         | 0 (0.0)   | 1 (0.8)   | 0         | 0.57            | 0        | 1 (0.4)    | 0.43            |
| Chlorpyrifos        | 12 (3.1)  | 0         | 6 (4.1)   | 3 (2.3)   | 3 (4.1)   | 0.5             | 7 (4.7)  | 5 (2.1)    | 0.14            |
| Clothianidin        | 2 (0.5)   | 1 (2.4)   | 1 (0.7)   | 0         | 0         | 0.25            | 0        | 2 (0.8)    | 0.27            |
| Cypermethrin        | 32 (8.2)  | 9 (22.0)  | 6 (4.1)   | 12 (9.2)  | 5 (6.8)   | 0.002           | 5 (3.4)  | 27 (11.1)  | 0.006           |
| Cyprodinil          | 1 (0.3)   | 0         | 1 (0.7)   | 0         | 0         | 0.64            | 1 (0.7)  | 0          | 0.2             |
| Deltamethrin        | 9 (2.3)   | 0         | 4 (2.7)   | 3 (2.3)   | 2 (2.7)   | 0.76            | 4 (2.7)  | 5 (2.1)    | 0.69            |
| Diazinon            | 1 (0.3)   | 0         | 0         | 1 (0.8)   | 0         | 0.57            | 1 (0.7)  | 0          | 0.2             |
| Difenoconazole      | 10 (2.6)  | 0         | 5 (3.4)   | 3 (2.3)   | 2 (2.7)   | 0.67            | 3 (2.0)  | 7 (2.9)    | 0.6             |
| Dinotefuran         | 3 (0.8)   | 0         | 2 (1.4)   | 1 (0.8)   | 0         | 0.66            | 0        | 3 (1.2)    | 0.17            |
| Emamectin           | 4 (1.0)   | 0         | 1 (0.7)   | 3 (2.3)   | 0         | 0.33            | 1 (0.7)  | 3 (1.2)    | 0.59            |
| Ethoprophos         | 1 (0.3)   | 0         | 0         | 1 (0.8)   | 0         | 0.57            | 1 (0.7)  | 0          | 0.2             |
| Etofenprox          | 1 (0.3)   | 0         | 1 (0.7)   | 0         | 0         | 0.64            | 0        | 1 (0.4)    | 0.43            |
| Fenamiphos          | 1 (0.3)   | 0         | 0         | 1 (0.8)   | 0         | 0.57            | 1 (0.7)  | 0          | 0.2             |
| Fenbuconazole       | 3 (0.8)   | 0         | 1 (0.7)   | 2 (1.5)   | 0 (0.0)   | 0.59            | 2 (1.3)  | 1 (0.4)    | 0.3             |

|                      |          |         |         |          |         |      |           |          |        |
|----------------------|----------|---------|---------|----------|---------|------|-----------|----------|--------|
| Fenhexamid           | 1 (0.3)  | 0       | 1 (0.7) | 0        | 0       | 0.64 | 0         | 1 (0.4)  | 0.43   |
| Fenpropimorph        | 1 (0.3)  | 0       | 0       | 0        | 1 (1.4) | 0.23 | 1 (0.7)   | 0        | 0.2    |
| Fenpyroximate        | 1 (0.3)  | 0       | 0       | 0        | 1 (1.4) | 0.23 | 1 (0.7)   | 0        | 0.2    |
| Fipronil             | 3 (0.8)  | 0       | 2 (1.4) | 0        | 1 (1.4) | 0.5  | 0         | 3 (1.2)  | 0.17   |
| Fludioxonil          | 17 (4.3) | 0       | 8 (5.5) | 6 (4.6)  | 3 (4.1) | 0.5  | 14 (9.4)  | 3 (1.2)  | <0.001 |
| Fluopyram            | 5 (1.3)  | 1 (2.4) | 0 (0.0) | 2 (1.5)  | 2 (2.7) | 0.31 | 2 (1.3)   | 3 (1.2)  | 0.93   |
| Flutriafol           | 1 (0.3)  | 0       | 1 (0.7) | 0        | 0       | 0.64 | 1 (0.7)   | 0        | 0.2    |
| Imazalil             | 18 (4.6) | 2 (4.9) | 6 (4.1) | 6 (4.6)  | 4 (5.4) | 0.98 | 11 (7.4)  | 7 (2.9)  | 0.04   |
| Imidacloprid         | 15 (3.8) | 2 (4.9) | 5 (3.4) | 5 (3.8)  | 3 (4.1) | 0.98 | 1 (0.7)   | 14 (5.8) | 0.01   |
| Indoxacarb           | 20 (5.1) | 2 (4.9) | 3 (2.1) | 13 (9.9) | 2 (2.7) | 0.02 | 1 (0.7)   | 19 (7.8) | 0.001  |
| Lambda-Cyhalothrin   | 8 (2.0)  | 0       | 4 (2.7) | 2 (1.5)  | 2 (2.7) | 0.67 | 4 (2.7)   | 4 (1.6)  | 0.48   |
| Malathion            | 3 (0.8)  | 0       | 3 (2.1) | 0        | 0       | 0.16 | 1 (0.7)   | 2 (0.8)  | 0.87   |
| Metalaxyl            | 9 (2.3)  | 1 (2.4) | 5 (3.4) | 2 (1.5)  | 1 (1.4) | 0.69 | 0 (0)     | 9 (3.7)  | 0.02   |
| Methomyl             | 1 (0.3)  | 0       | 0       | 1 (0.8)  | 0       | 0.57 | 0         | 1 (0.4)  | 0.43   |
| Metribuzin           | 1 (0.3)  | 0       | 0       | 1 (0.8)  | 0       | 0.57 | 0         | 1 (0.4)  | 0.43   |
| Myclobutanil         | 3 (0.8)  | 0       | 3 (2.1) | 0        | 0       | 0.16 | 2 (1.3)   | 1 (0.4)  | 0.3    |
| Penconazole          | 1 (0.3)  | 0       | 1 (0.7) | 0        | 0       | 0.64 | 0         | 1 (0.4)  | 0.43   |
| Pendimethalin        | 2 (0.5)  | 0       | 1 (0.7) | 1 (0.8)  | 0       | 0.84 | 1 (0.7)   | 1 (0.4)  | 0.73   |
| Phosmet              | 1 (0.3)  | 0       | 0       | 0        | 1 (1.4) | 0.23 | 1 (0.7)   | 0        | 0.2    |
| Pirimicarb           | 2 (0.5)  | 1 (2.4) | 1 (0.7) | 0        | 0       | 0.25 | 2 (1.3)   | 0        | 0.07   |
| Pirimicarb desmethyl | 1 (0.3)  | 0       | 1 (0.7) | 0        | 0       | 0.64 | 1 (0.7)   | 0        | 0.2    |
| Propamocarb          | 1 (0.3)  | 0       | 0       | 0        | 1 (1.4) | 0.23 | 0         | 1 (0.4)  | 0.43   |
| Propargite           | 1 (0.3)  | 0       | 1 (0.7) | 0        | 0       | 0.64 | 0         | 1 (0.4)  | 0.43   |
| Propiconazole        | 1 (0.3)  | 0       | 1 (0.7) | 0        | 0       | 0.64 | 0         | 1 (0.4)  | 0.43   |
| Pyraclostrobin       | 3 (0.8)  | 0       | 1 (0.7) | 1 (0.8)  | 1 (1.4) | 0.88 | 1 (0.7)   | 2 (0.8)  | 0.87   |
| Pyridaben            | 1 (0.3)  | 0       | 0       | 1 (0.8)  | 0       | 0.57 | 1 (0.7)   | 0        | 0.2    |
| Pyrimethanil         | 22 (5.6) | 2 (4.9) | 8 (5.5) | 8 (6.1)  | 4 (5.4) | 0.99 | 15 (10.1) | 7 (2.9)  | 0.002  |
| Pyriproxyfen         | 1 (0.3)  | 0       | 0       | 1 (0.8)  | 0       | 0.57 | 0         | 1 (0.4)  | 0.43   |

|                    |          |         |         |         |         |      |         |          |        |
|--------------------|----------|---------|---------|---------|---------|------|---------|----------|--------|
| Spirodiclofen      | 1 (0.3)  | 0       | 1 (0.7) | 0       | 0       | 0.64 | 1 (0.7) | 0        | 0.2    |
| Tebuconazole       | 9 (2.3)  | 0       | 4 (2.7) | 3 (2.3) | 2 (2.7) | 0.76 | 2 (1.3) | 7 (2.9)  | 0.32   |
| Tetraconazole      | 2 (0.5)  | 1 (2.4) | 0 (0.0) | 1 (0.8) | 0       | 0.23 | 2 (1.3) | 0        | 0.07   |
| Tetramethrin       | 1 (0.3)  | 0       | 1 (0.7) | 0       | 0       | 0.64 | 0       | 1 (0.4)  | 0.43   |
| Thiabendazole      | 12 (3.1) | 0       | 5 (3.4) | 3 (2.3) | 4 (5.4) | 0.39 | 9 (6.0) | 3 (1.2)  | <0.001 |
| Thiamethoxam       | 18 (4.6) | 4 (9.8) | 7 (4.8) | 3 (2.3) | 4 (5.4) | 0.24 | 3 (2.0) | 15 (6.2) | 0.06   |
| Thiophanate-methyl | 2 (0.5)  | 0       | 2 (1.4) | 0       | 0       | 0.34 | 1 (0.7) | 1 (0.4)  | 0.73   |
| Triadimenol        | 1 (0.3)  | 0       | 1 (0.7) | 0       | 0       | 0.64 | 1 (0.7) | 0        | 0.2    |
| Trifloxystrobin    | 3 (0.8)  | 0       | 3 (2.1) | 0       | 0       | 0.16 | 1 (0.7) | 2 (0.8)  | 0.87   |

**Note:** Data presented as N (%).

**Table S3:** Concentration of Pesticide Residues limited to only one category of Region

| <b>Pesticide Residues<br/>(mg/kg)</b> | <b>Overall</b> | <b>Western</b> | <b>Central</b> | <b>Northern</b> | <b>Eastern</b> |
|---------------------------------------|----------------|----------------|----------------|-----------------|----------------|
| Carbendazim                           | 0.02 ± 0.00    |                | 0.02 ± 0.00    |                 |                |
| Chlorfenapyr                          | 0.01           |                |                | 0.01            |                |
| Cyprodinil                            | 0.03           |                | 0.03           |                 |                |
| Diazinon                              | 0.01           |                |                | 0.01            |                |
| Ethoprophos                           | 0.01           |                |                | 0.01            |                |
| Etofenprox                            | 0.12           |                | 0.12           |                 |                |
| Fenamiphos                            | 0.19           |                |                | 0.19            |                |
| Fenhexamid                            | 0.01           |                | 0.01           |                 |                |
| Fenpyroximate                         | 0.03           |                |                |                 | 0.03           |
| Flutriafol                            | 0.01           |                | 0.01           |                 |                |
| Malathion                             | 0.14 ± 0.13    |                | 0.14 ± 0.13    |                 |                |
| Methomyl                              | 0.01           |                |                | 0.01            |                |
| Myclobutanil                          | 0.03 ± 0.01    |                | 0.03 ± 0.01    |                 |                |
| Phosmet                               | 0.01           |                |                |                 | 0.01           |
| Pirimicarb desmethyl                  | 0.27           |                | 0.27           |                 |                |
| Propamocarb                           | 0.05           |                |                |                 | 0.05           |
| Propargite                            | 0.01           |                | 0.01           |                 |                |
| Propiconaz                            | 0.02           |                | 0.02           |                 |                |
| Pyridaben                             | 0.03           |                |                | 0.03            |                |
| Pyriproxyfen                          | 0.01           |                |                | 0.01            |                |
| Spirodiclofen                         | 0.15           |                | 0.15           |                 |                |
| Thiophanate-methyl                    | 0.02 ± 0.01    |                | 0.02 ± 0.01    |                 |                |
| Triadimenol                           | 0.04           |                | 0.04           |                 |                |
| Trifloxystrobin                       | 0.00 ± 0.00    |                | 0.00 ± 0.00    |                 |                |

**Note:** Data presented as Mean ± SE when two or more samples are available.

**Table S4.** Concentration of Pesticide Residues that were limited to only one category of food type.

| <b>Pesticide Residues (mg/kg)</b> | <b>Fruits</b> | <b>Vegetables</b> |
|-----------------------------------|---------------|-------------------|
| Bupirimate                        | 0.02 ± 0.01   |                   |
| Chlorfenapyr                      |               | 0.01              |
| Clothianidin                      |               | 0.09 ± 0.08       |
| Cyprodinil                        | 0.03 ±        |                   |
| Diazinon                          | 0.01          |                   |
| Dinotefuran                       |               | 0.02 ± 0.00       |
| Ethoprophos                       | 0.01          |                   |
| Etofenprox                        |               | 0.12              |
| Fenamiphos                        | 0.19          |                   |
| Fenhexamid                        |               | 0.01              |
| Fenpropimorph                     | <0.01         |                   |
| Fenpyroximate                     | 0.03          |                   |
| Fipronil                          |               | 0.29 ± 0.27       |
| Flutriafol                        | 0.01          |                   |
| Metalaxyl                         |               | 0.02 ± 0.01       |
| Methomyl                          |               | 0.01              |
| Metribuzin                        |               | <0.01             |
| Penconazole                       |               | <0.01             |
| Phosmet                           | 0.01          |                   |
| Pirimicarb                        | 0.02 ± 0.00   |                   |
| Pirimicarb desmethyl              | 0.27          |                   |
| Propamocarb                       |               | 0.05              |
| Propargite                        |               | 0.01              |
| Propiconazole                     |               | 0.02              |
| Pyridaben                         | 0.03          |                   |
| Pyriproxyfen                      |               | 0.01              |
| Spirodiclofen                     | 0.15          |                   |
| Tetraconazole                     | 0.01 ± 0.0    |                   |
| Tetramethrin                      |               | <0.01             |
| Triadimenol                       | 0.04          |                   |

**Note:** Data presented as Mean ± SE when two or more samples are available.
